# Supplementary material for: Dinuclear gold(i) complexes with pyrimidine- and m-carborane-based bisphosphine ligands: synthesis, structure, photoluminescence and cytotoxicity against malignant pleural mesothelioma
Source: Royal Society of Chemistry journal article supplement (doi:10.1039/d4nj02047b), 2024-01-01
Supplement: d4nj02047b1.pdf [file d4nj02047b1.pdf]

# Supporting Information for

## Dinuclear gold(I) complexes with pyrimidine- and *m*-carborane-based bisphosphine ligands: synthesis, structure, photoluminescence and cytotoxicity against malignant pleural mesothelioma

Elena E. Bardina,<sup>a</sup> Egor M. Matnurov,<sup>b</sup> Ivan V. Bakaev,<sup>a</sup> Mariana I. Rakhmanova,<sup>a</sup> Maria P. Davydova,<sup>a</sup> Alexander V. Artem'ev,<sup>a\*</sup> Maria V. Babak,<sup>b\*</sup> Artem L. Gushchin<sup>a\*</sup>

<sup>a</sup> *Nikolaev Institute of Inorganic Chemistry SB RAS, 3 Acad. Lavrentiev Avenue, Novosibirsk, 630090, Russian Federation*

<sup>b</sup> *Drug Discovery Lab, Department of Chemistry, City University of Hong Kong, 83 Tat Chee Avenue, Hong Kong SAR, 999077, People's Republic of China*

### Table of contents

**Table S1.** Crystal data and structure refinement for **Au1** and **Au2**·1.8CH<sub>2</sub>Cl<sub>2</sub>

**Table S2.** Selected geometric parameters for crystal structures of **Au1** and **Au2**·1.8CH<sub>2</sub>Cl<sub>2</sub>

**Fig. S1.** Molecular packing of **Au1**

**Fig. S2.** Molecular packing of **Au2**·1.8CH<sub>2</sub>Cl<sub>2</sub>

**Fig. S3.** Decay time for **Au1** (left) and **Au2** (right), T = 300 K

**Fig. S4.** Concentration-effect curves for **Au1**, L1, Au(tht)Cl, and cisplatin in AB1, JU77, and MRC-5 cell lines upon 72 h exposure

**Fig. S5.** UV-Vis spectra of complexes **Au1** and **Au2** in CH<sub>2</sub>Cl<sub>2</sub>.

**Table S1.** Crystal data and structure refinement for **Au1** and **Au2**·1.8CH<sub>2</sub>Cl<sub>2</sub>

|                                                                                                                | <b>Au1</b>                                                                                    | <b>Au2</b> ·1.8CH <sub>2</sub> Cl <sub>2</sub>                                                       |
|----------------------------------------------------------------------------------------------------------------|-----------------------------------------------------------------------------------------------|------------------------------------------------------------------------------------------------------|
| Chemical formula                                                                                               | C <sub>28</sub> H <sub>22</sub> Au <sub>2</sub> Cl <sub>2</sub> N <sub>2</sub> P <sub>2</sub> | C <sub>61.8</sub> H <sub>79.6</sub> Au <sub>4</sub> B <sub>20</sub> C <sub>17.6</sub> P <sub>4</sub> |
| <i>M<sub>r</sub></i>                                                                                           | 913.25                                                                                        | 2219.96                                                                                              |
| Crystal system, space group                                                                                    | Triclinic, <i>P</i> 1                                                                         | Monoclinic, <i>C2/c</i>                                                                              |
| <i>a</i> , <i>b</i> , <i>c</i> (Å)                                                                             | 9.2240 (2), 13.7796 (3),<br>21.7778 (4)                                                       | 32.1688 (10), 13.7076 (4),<br>18.0035 (6)                                                            |
| α, β, γ (°)                                                                                                    | 94.548 (1), 91.601 (1), 90.471 (1)                                                            | 90, 102.182 (1), 90                                                                                  |
| <i>V</i> (Å <sup>3</sup> )                                                                                     | 2758.08 (10)                                                                                  | 7760.0 (4)                                                                                           |
| μ (mm <sup>-1</sup> )                                                                                          | 10.96                                                                                         | 7.87                                                                                                 |
| Crystal size (mm)                                                                                              | 0.20 × 0.20 × 0.15                                                                            | 0.20 × 0.20 × 0.08                                                                                   |
| <i>T</i> <sub>min</sub> , <i>T</i> <sub>max</sub>                                                              | 0.422, 0.746                                                                                  | 0.479, 0.746                                                                                         |
| No. of measured, independent and observed [ <i>I</i> > 2σ( <i>I</i> )] reflections                             | 51948, 16837, 14870                                                                           | 48239, 10914, 8991                                                                                   |
| <i>R</i> <sub>int</sub>                                                                                        | 0.045                                                                                         | 0.034                                                                                                |
| (sin θ/λ) <sub>max</sub> (Å <sup>-1</sup> )                                                                    | 0.715                                                                                         | 0.695                                                                                                |
| Range of <i>h</i> , <i>k</i> , <i>l</i>                                                                        | <i>h</i> = -13→13,<br><i>k</i> = -19→19,<br><i>l</i> = -31→31                                 | <i>h</i> = -41→44,<br><i>k</i> = -19→19,<br><i>l</i> = -24→25                                        |
| <i>R</i> [ <i>F</i> <sup>2</sup> > 2σ( <i>F</i> <sup>2</sup> )], <i>wR</i> ( <i>F</i> <sup>2</sup> ), <i>S</i> | 0.030, 0.073, 1.07                                                                            | 0.031, 0.073, 1.03                                                                                   |
| No. of reflections                                                                                             | 16837                                                                                         | 10914                                                                                                |
| No. of parameters                                                                                              | 750                                                                                           | 563                                                                                                  |
| No. of restraints                                                                                              | 739                                                                                           | 564                                                                                                  |
| Weighting scheme                                                                                               | $w = 1/[\sigma^2(F_o^2) + 0.8746P]$<br>where $P = (F_o^2 + 2F_c^2)/3$                         | $w = 1/[\sigma^2(F_o^2) + (0.0259P)^2 + 44.2983P]$<br>where $P = (F_o^2 + 2F_c^2)/3$                 |
| Δρ <sub>max</sub> , Δρ <sub>min</sub> (e Å <sup>-3</sup> )                                                     | 1.58, -2.15                                                                                   | 3.43, -1.86                                                                                          |

Computer programs: *APEX3* (Bruker-AXS, 2016), *SAINT* (Bruker-AXS, 2016), *SHELXT* 2018/2 (Sheldrick, 2018), *SHELXL2019/2* (Sheldrick, 2019), *ShelXle* (Hübschle, 2011), *enCIFer* (Allen *et al.*, 2004).

**Table S2.** Selected geometric parameters for crystal structures of **Au1** and **Au2·1.8CH<sub>2</sub>Cl<sub>2</sub>**

| <b>Au1</b>                                 |             |               |             |
|--------------------------------------------|-------------|---------------|-------------|
| <b>Distances, Å</b>                        |             |               |             |
| P2—Au2B (1)                                | 2.3068 (10) | Cl3B—Au3B (2) | 2.280 (8)   |
| P2—Au2A (1)                                | 2.1629 (9)  | Cl3A—Au3A (2) | 2.299 (8)   |
| Au1—Cl1 (1)                                | 2.2831 (10) | Au4—Cl4 (2)   | 2.2835 (9)  |
| Au2B—Cl2B (1)                              | 2.3035 (16) | Au3B—P3B (2)  | 2.241 (8)   |
| Au2A—Cl2A (1)                              | 2.2987 (16) | Au3A—P3A (2)  | 2.217 (8)   |
| Au1—P1 (1)                                 | 2.2200 (8)  | Au4—P4 (2)    | 2.2260 (9)  |
| <b>Angles, °</b>                           |             |               |             |
| P1—Au1—Cl1                                 | 178.38 (4)  | P3B—Au3B—Cl3B | 175.1 (4)   |
| Cl2B—Au2B—P2                               | 174.16 (5)  | P3A—Au3A—Cl3A | 172.9 (5)   |
| P2—Au2A—Cl2A                               | 172.57 (5)  | P4—Au4—Cl4    | 176.25 (3)  |
| <b>Au2·1.8CH<sub>2</sub>Cl<sub>2</sub></b> |             |               |             |
| <b>Distances, Å</b>                        |             |               |             |
| Au1—Cl2                                    | 2.2775 (13) | P1—Au2        | 2.2423 (10) |
| Au2—Cl4                                    | 2.2813 (10) | Au1—P2        | 2.2357 (11) |
| <b>Angles, °</b>                           |             |               |             |
| P2—Au1—Cl2                                 | 173.99 (5)  | P1—Au2—Cl4    | 177.35 (4)  |

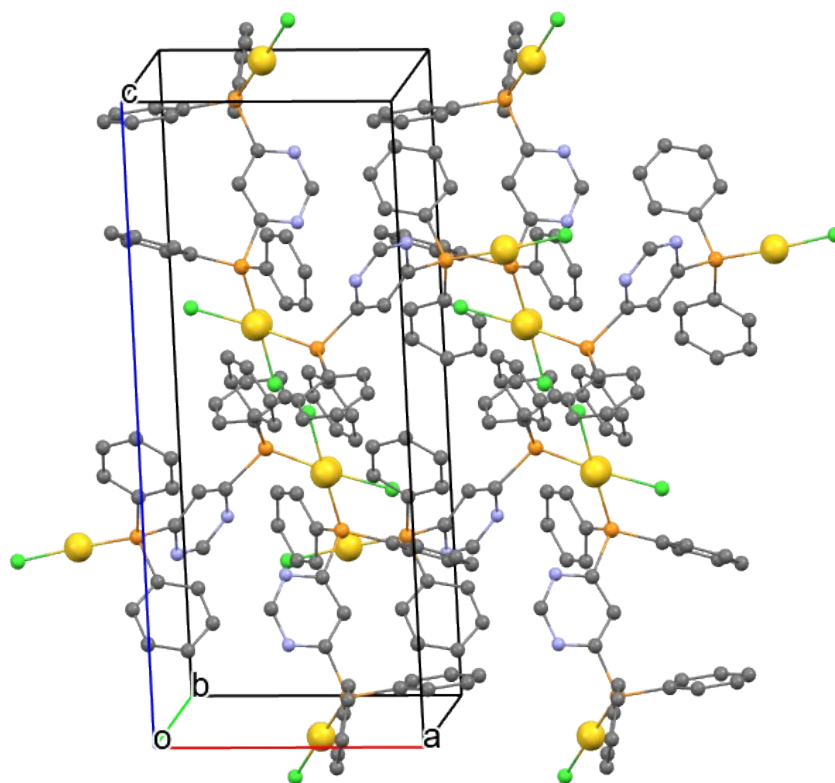

**Fig. S1.** Molecular packing of Au1

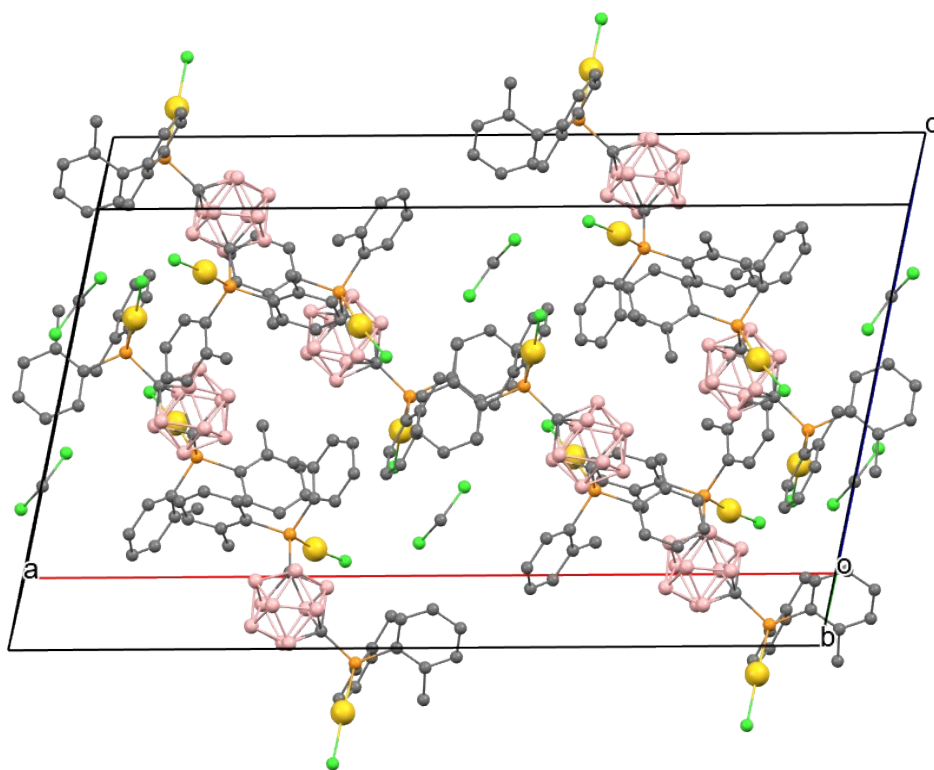

**Fig. S2.** Molecular packing of Au2·1.8CH<sub>2</sub>Cl<sub>2</sub>

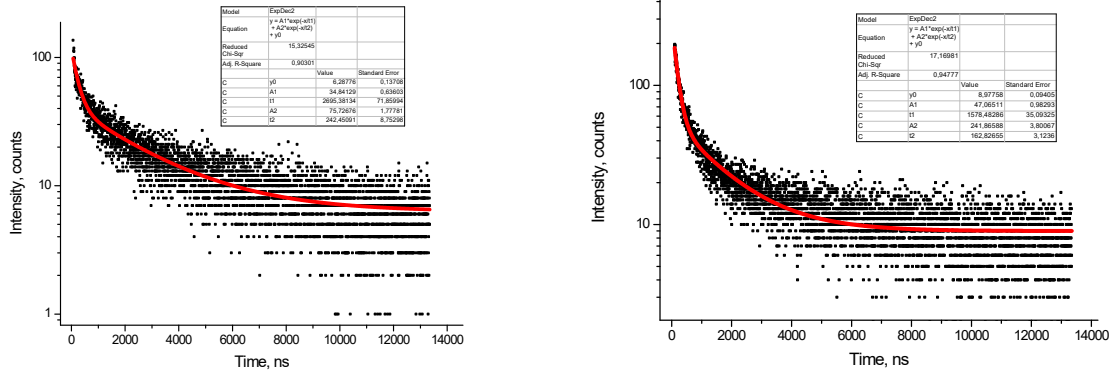

**Fig. S3.** Decay time for Au1 (left) and Au2 (right), T = 300 K

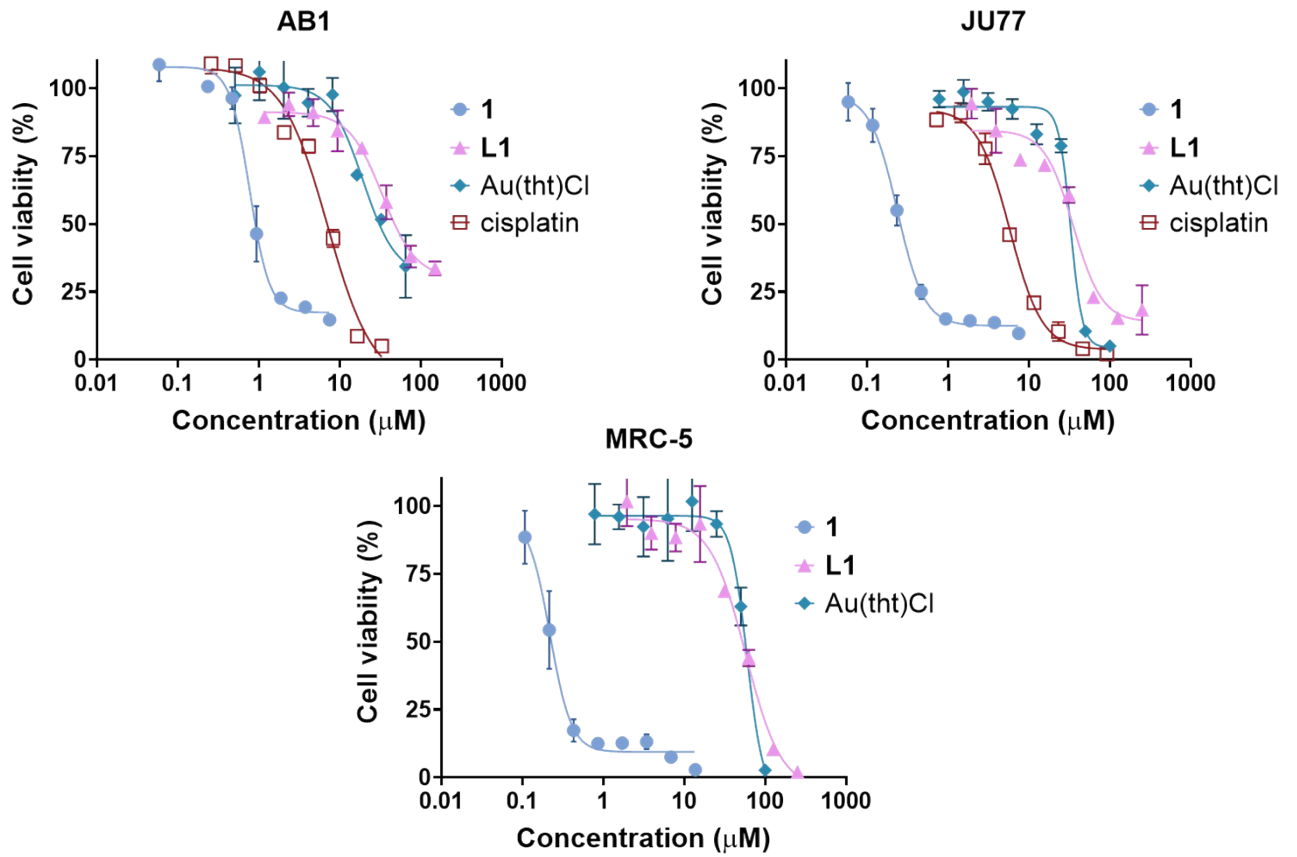

**Fig. S4.** Concentration-effect curves for Au1, L1, Au(tht)Cl, and cisplatin in AB1, JU77, and MRC-5 cell lines upon 72 h exposure

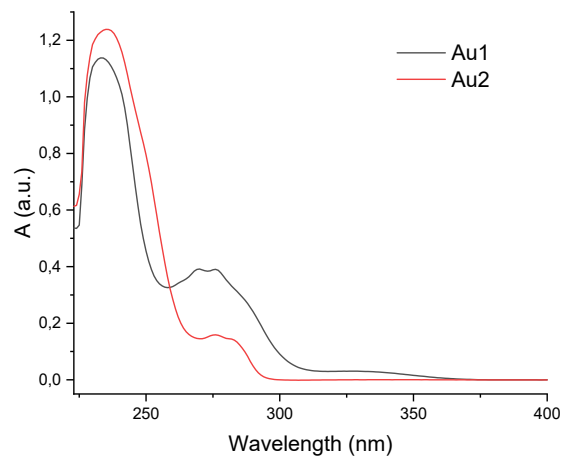

**Fig. S5.** UV-Vis spectra of complexes **Au1** and **Au2** in CH<sub>2</sub>Cl<sub>2</sub>
